# Supplementary material for: Zanthoxoaporphines A–C: Three new larvicidal dibenzo[de,g]quinolin-7-one alkaloids from Zanthoxylum paracanthum (Rutaceae)
Source: publisher site journal article supplement (doi:10.3762/bjoc.9.47), 2013-02-27
Supplement: Additional file 1 [file 1860-5397-9-47-S1.pdf]

## Supporting Information

for

### **Zanthoxoaporphines A–C: Three new larvicidal dibenzo[*de,g*]quinolin-7-one alkaloids from *Zanthoxylum paracanthum* (Rutaceae)**

Fidelis N. Samita<sup>1,2</sup>, Louis P. Sandjo<sup>3\*</sup>, Isaiah O. Ndiege<sup>2‡\*</sup>, Ahmed Hassanali<sup>2</sup>, Wilber Lwande<sup>4</sup>

Address: <sup>1</sup>Department of Chemistry, Maseno University, P.O. Private Bag Maseno, Kenya,

<sup>2</sup>Department of Chemistry, Kenyatta University, P.O. Box 43844, Nairobi 00100, Kenya,

<sup>3</sup>Department of Organic chemistry, University of Yaoundé 1, P.O. Box 812 Yaoundé

Cameroon and <sup>4</sup>Behavioural and Chemical Ecology Department, International Centre for

Insect Physiology and Ecology, P.O. Box 30772, Nairobi 00100, Kenya

Email: Louis P. Sandjo - plsandjo@yahoo.fr, Isaiah O. Ndiege - indiege@yahoo.com

<sup>‡</sup>Tel. +254-721818654

\*Corresponding author

### **NMR spectra of compounds**

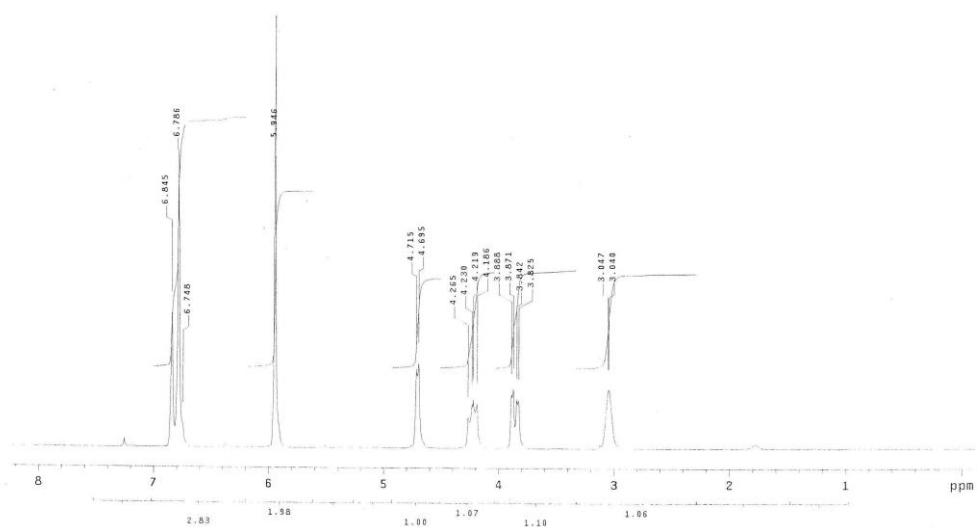

**Figure 1:** <sup>1</sup>H NMR spectrum of compound **1** (300 MHz, CDCl<sub>3</sub>).

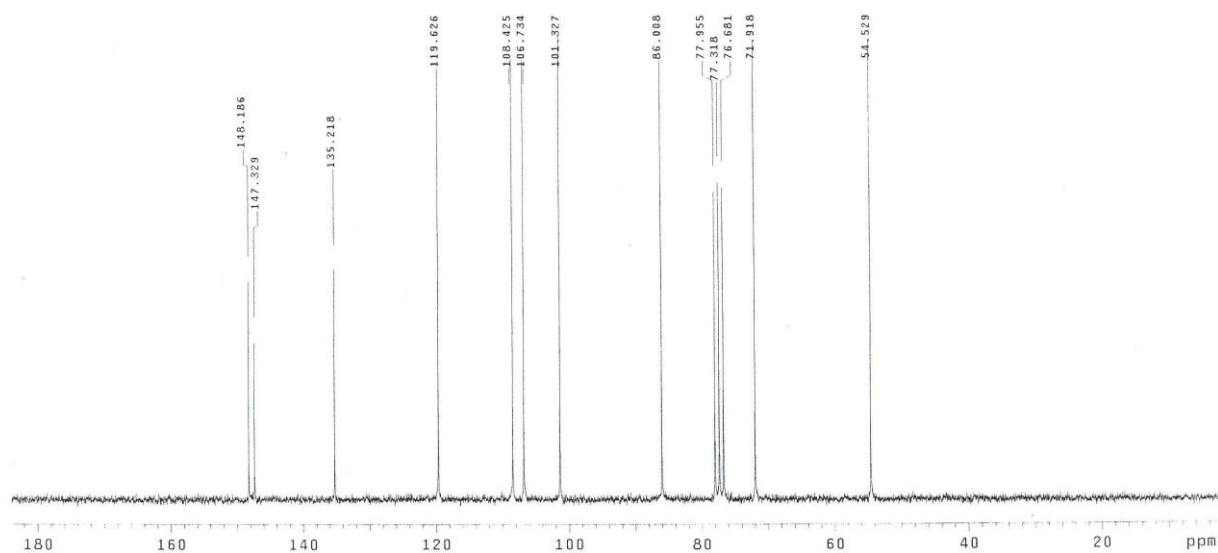

**Figure 2:** <sup>13</sup>C NMR spectrum of compound **1** (75 MHz, CDCl<sub>3</sub>).

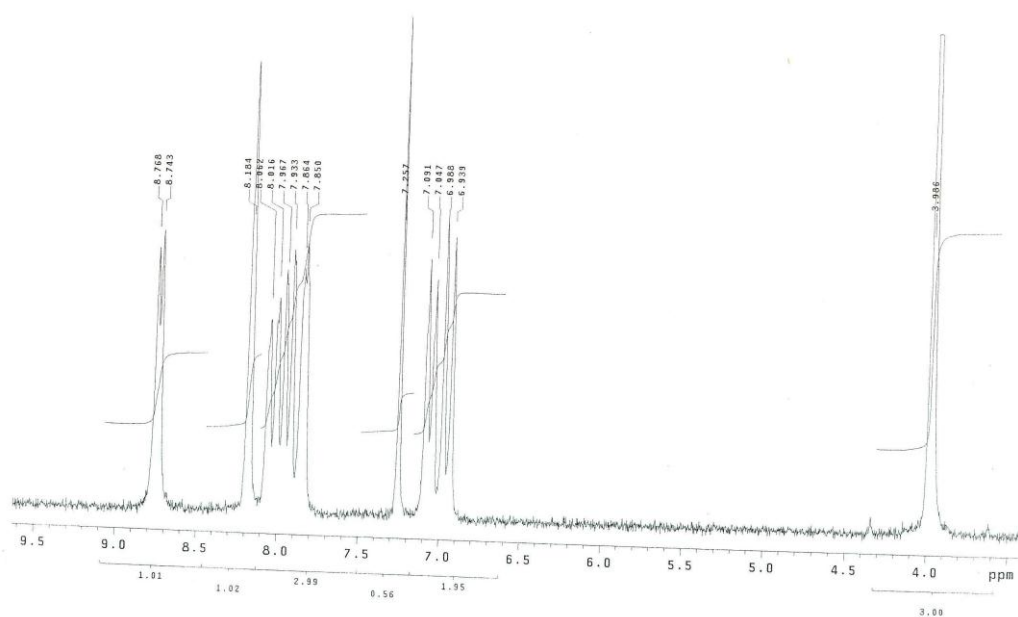

**Figure 3:** <sup>1</sup>H NMR spectrum of compound **2** (300 MHz, CDCl<sub>3</sub>).

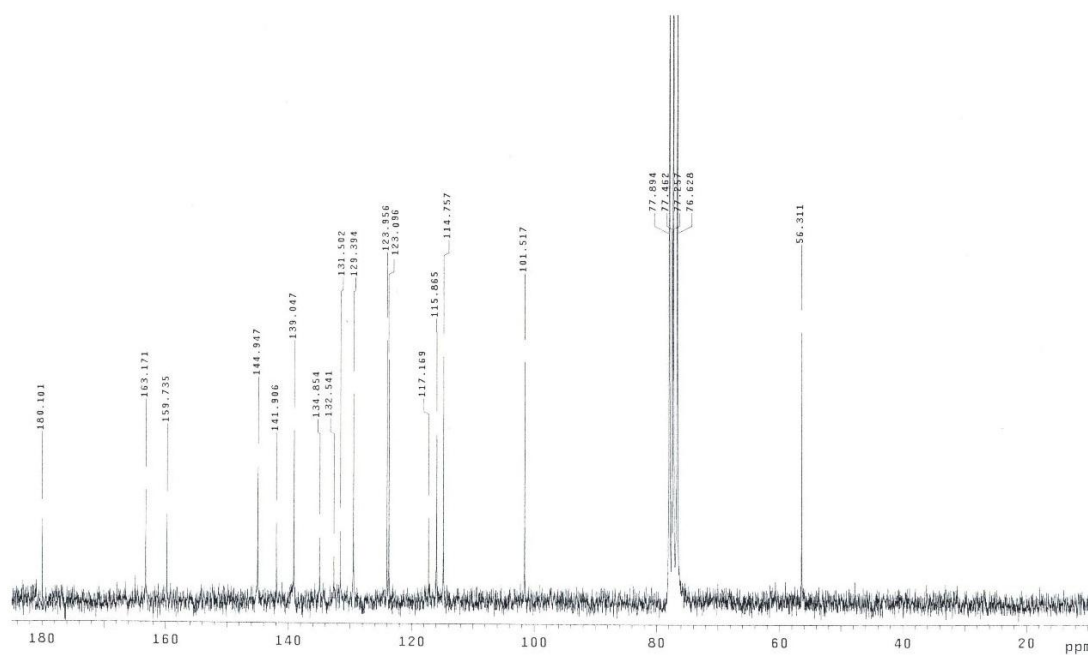

**Figure 4:** <sup>13</sup>C NMR spectrum of compound **2** (75 MHz, CDCl<sub>3</sub>).

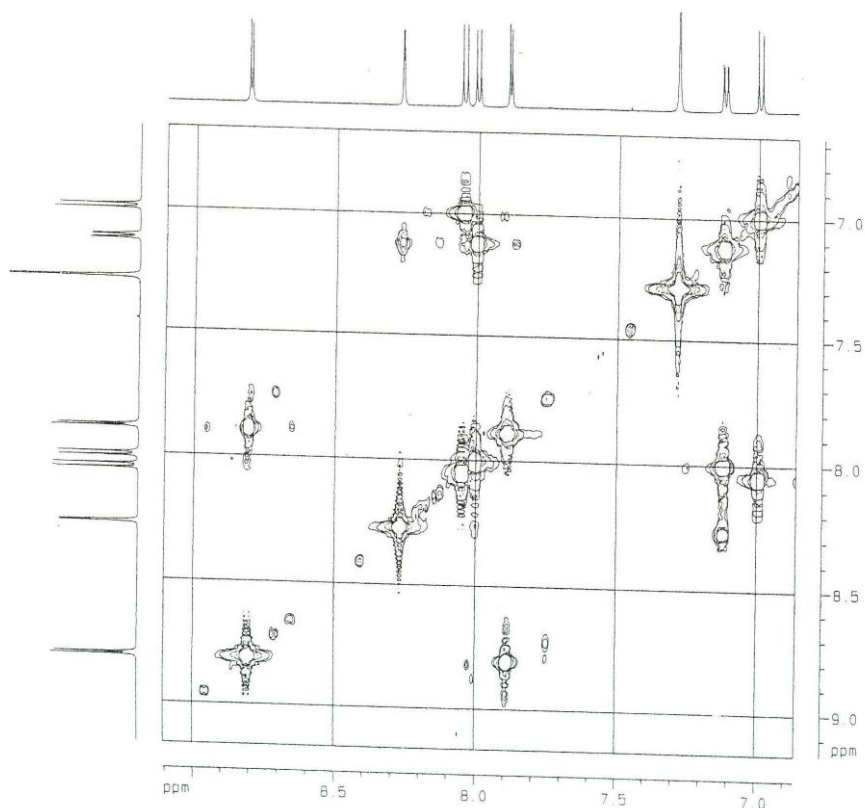

**Figure 5:** COSY spectrum of compound **2** (600 MHz, CDCl<sub>3</sub>).

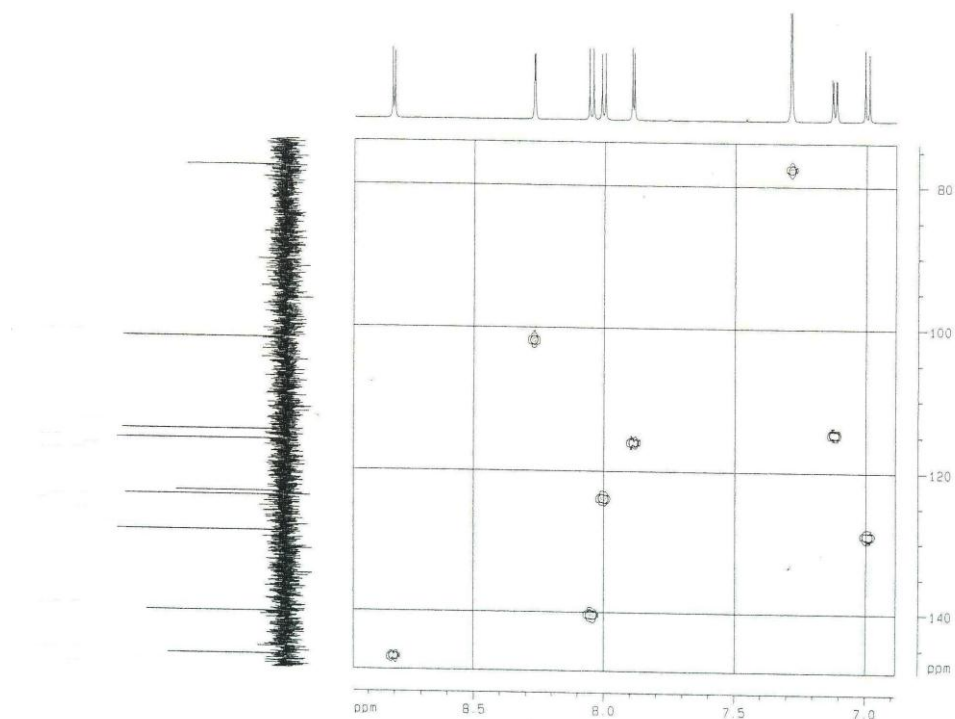

**Figure 6:** HMQC spectrum of compound **2** (600 MHz, CDCl<sub>3</sub>).

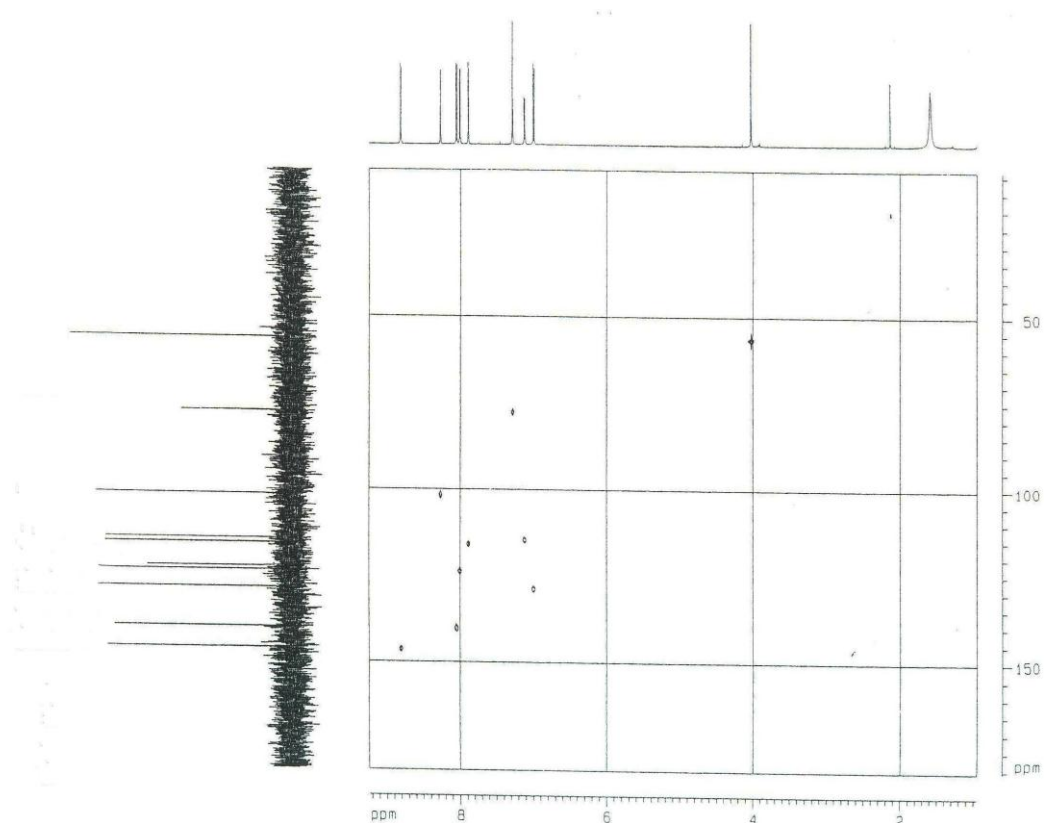

**Figure 7:** HMQC spectrum of compound **2** (600 MHz, CDCl<sub>3</sub>).

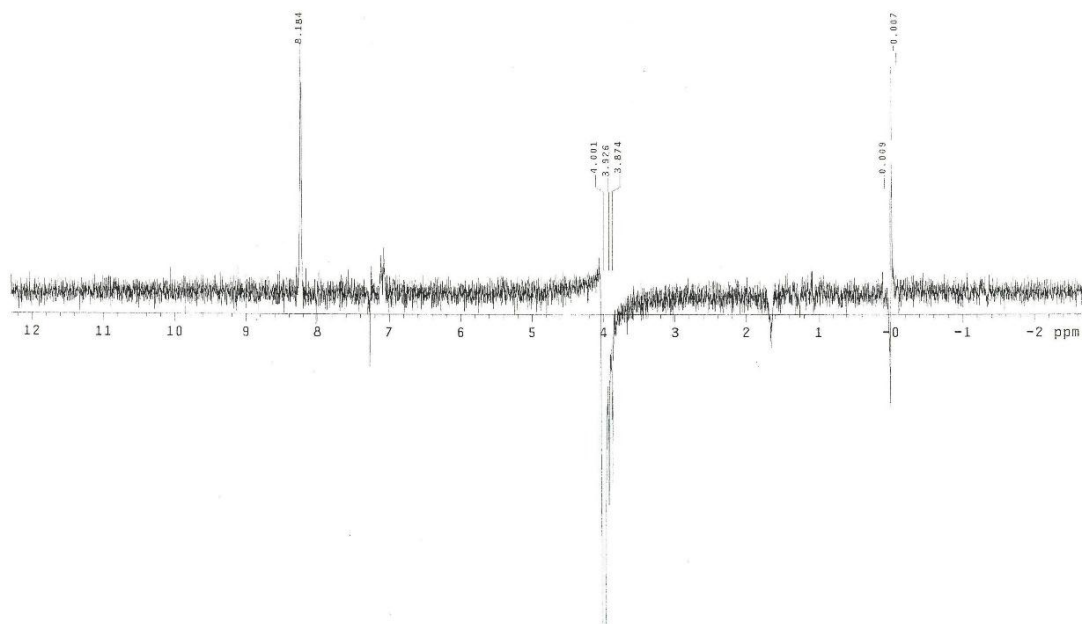

**Figure 8:** NOE spectrum of compound **2**.

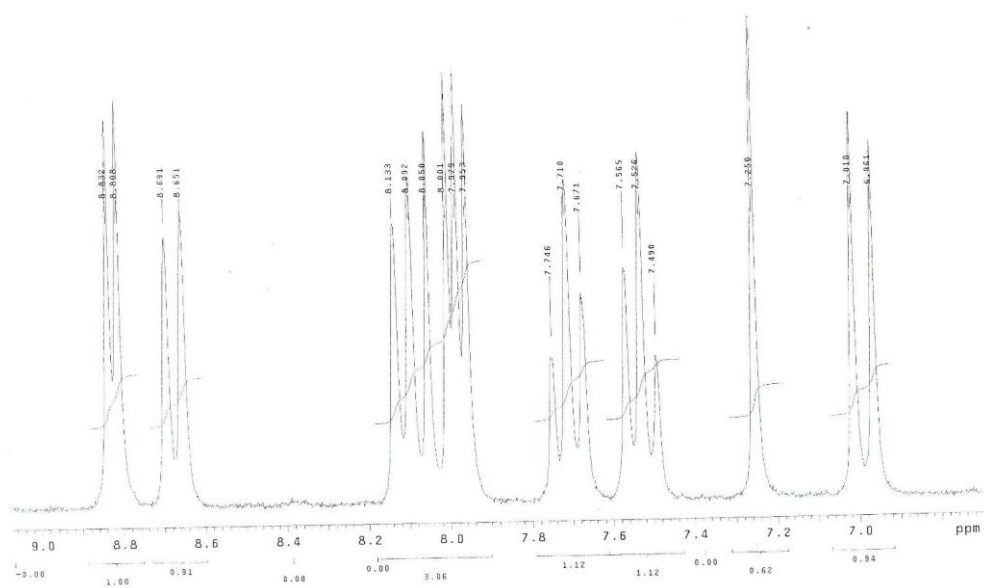

**Figure 9:** <sup>1</sup>H NMR spectrum of compound **3** (300 MHz, CDCl<sub>3</sub>).

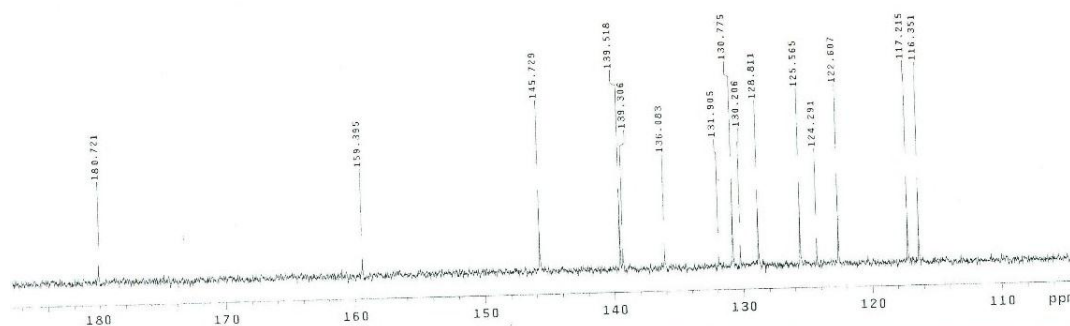

**Figure 10:** <sup>13</sup>C NMR spectrum of compound **3** (75 MHz, CDCl<sub>3</sub>).

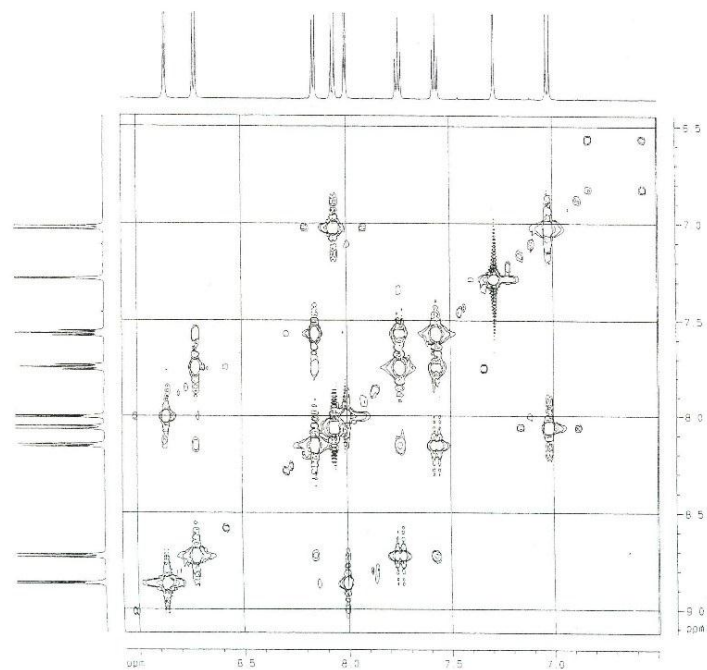

**Figure 11:** COSY spectrum of compound **3** (600 MHz, CDCl<sub>3</sub>).

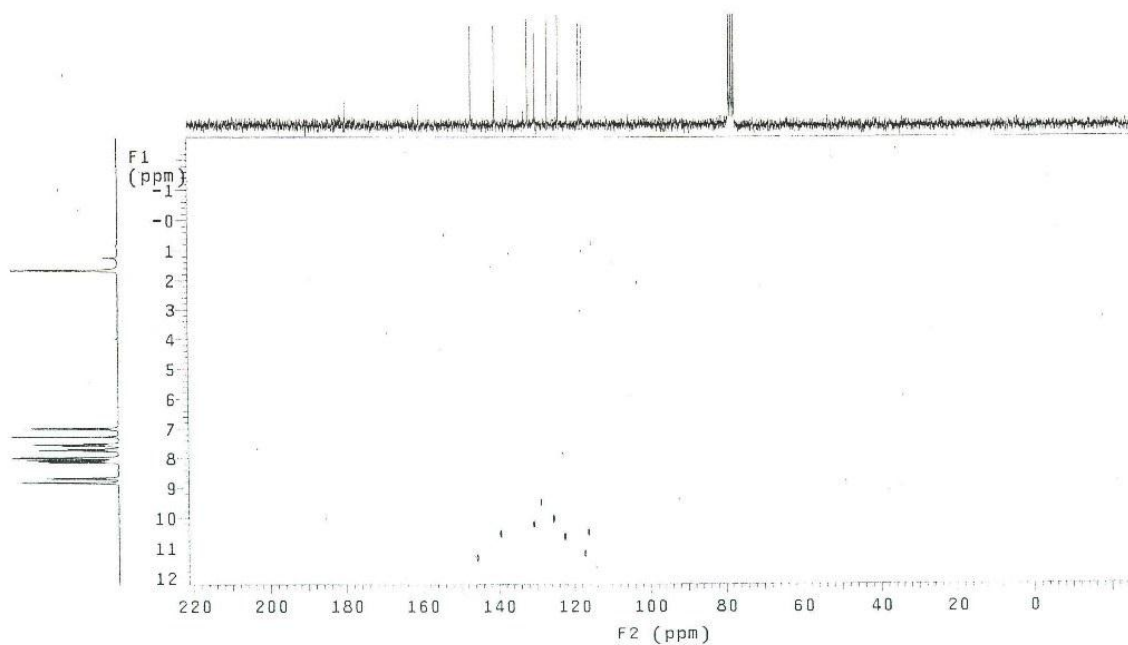

**Figure 12:** HETCOR spectrum of compound **3**.

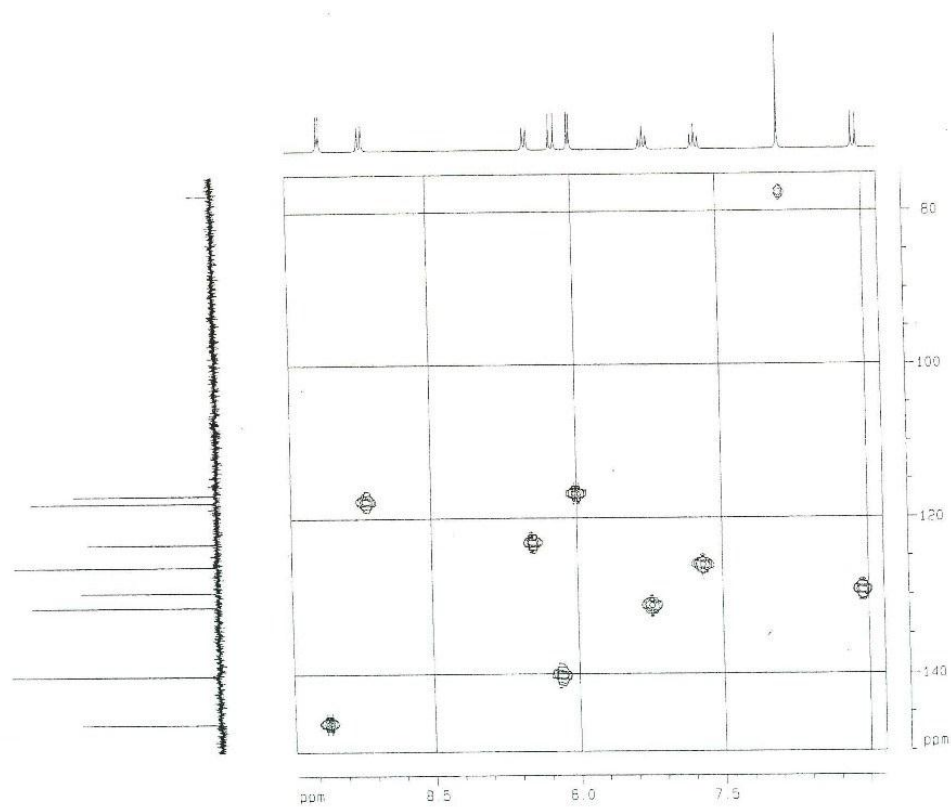

**Figure 13:** HMQC spectrum of compound **3**.

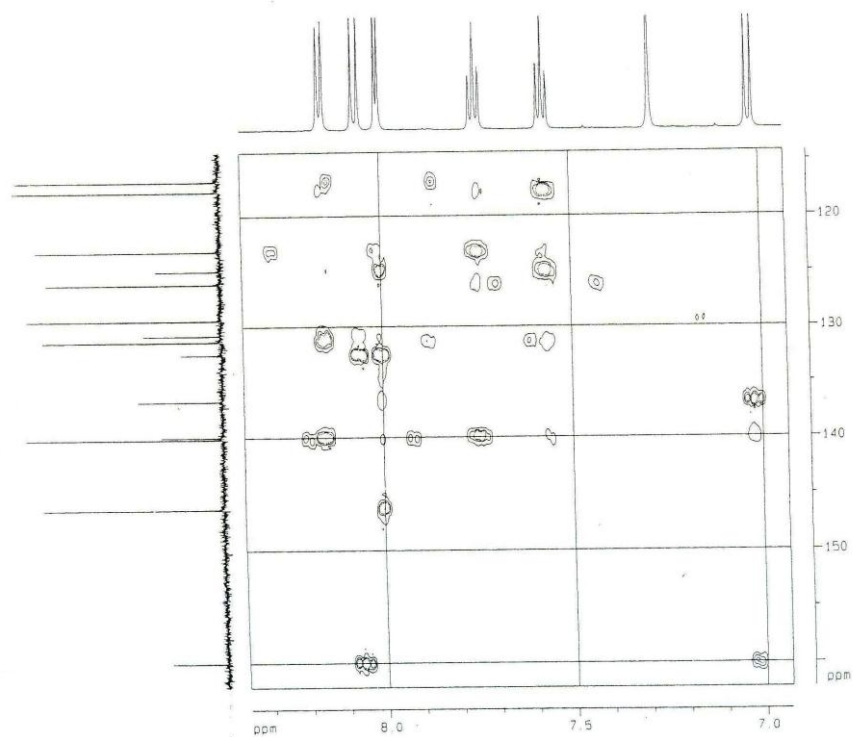

**Figure 14:** HMBC spectrum of compound **3**.



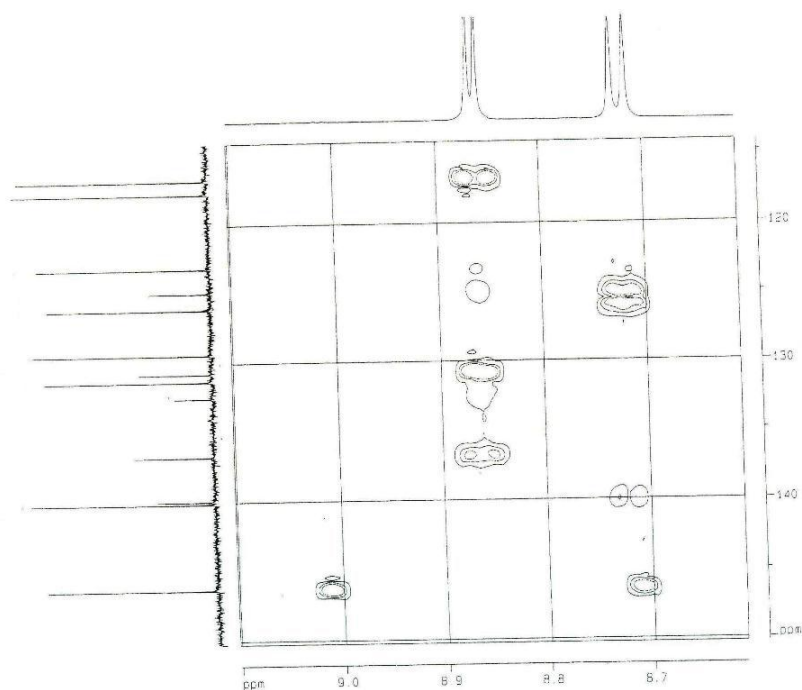

**Figure 15:** HMBC spectrum of compound **3**.

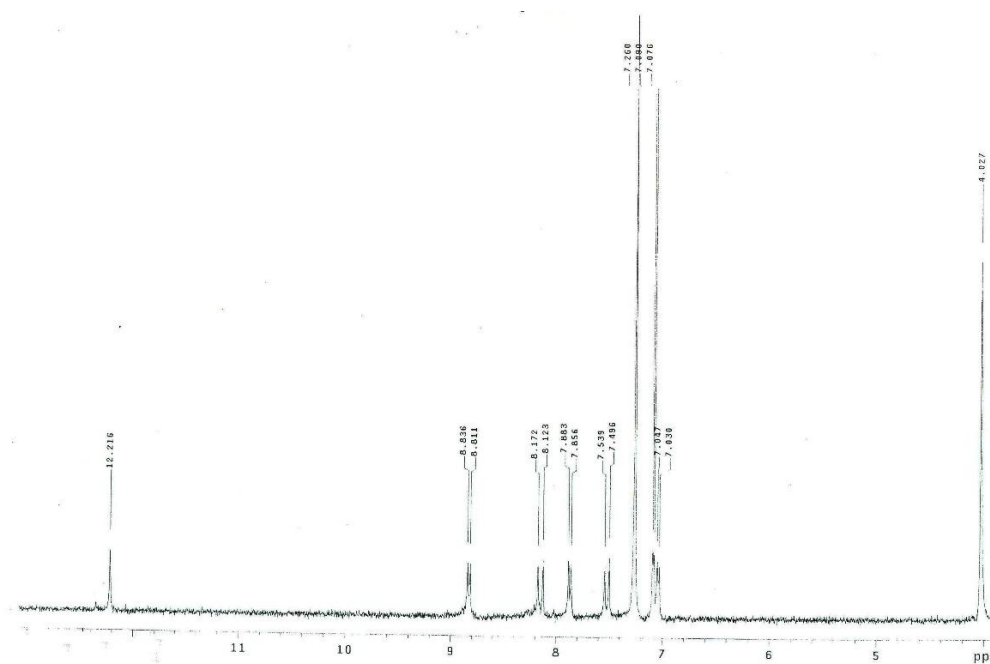

**Figure 16:**  $^1\text{H}$  NMR spectrum of compound **4** (300 MHz,  $\text{CDCl}_3$ ).

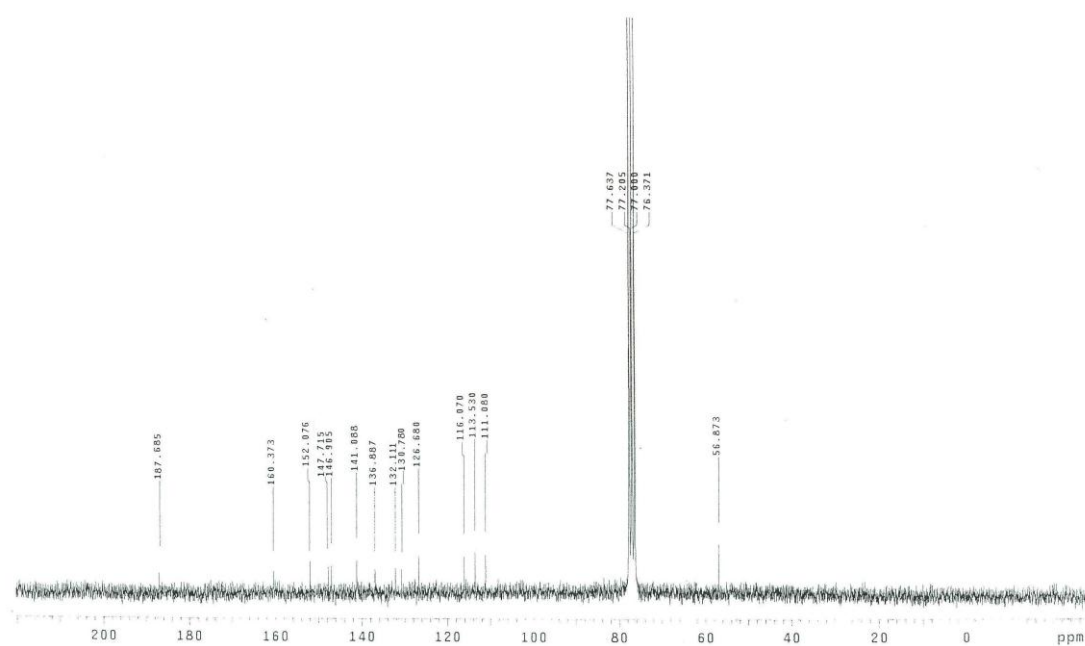

**Figure 17:** <sup>13</sup>C NMR spectrum of compound **4** (75 MHz, CDCl<sub>3</sub>).

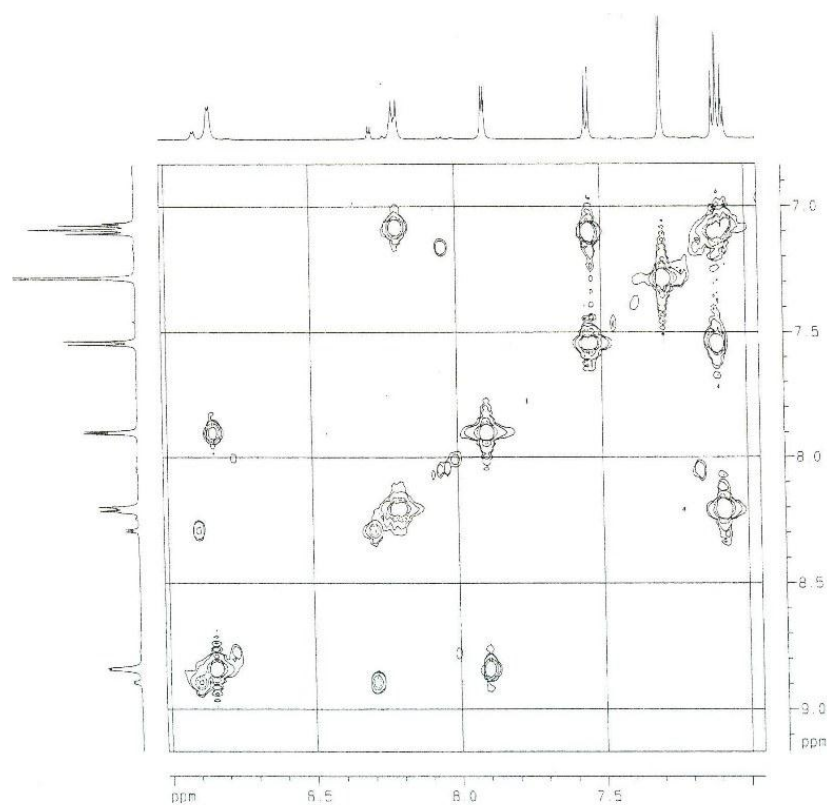

**Figure 18:** COSY spectrum of compound **4** (600 MHz, CDCl<sub>3</sub>).

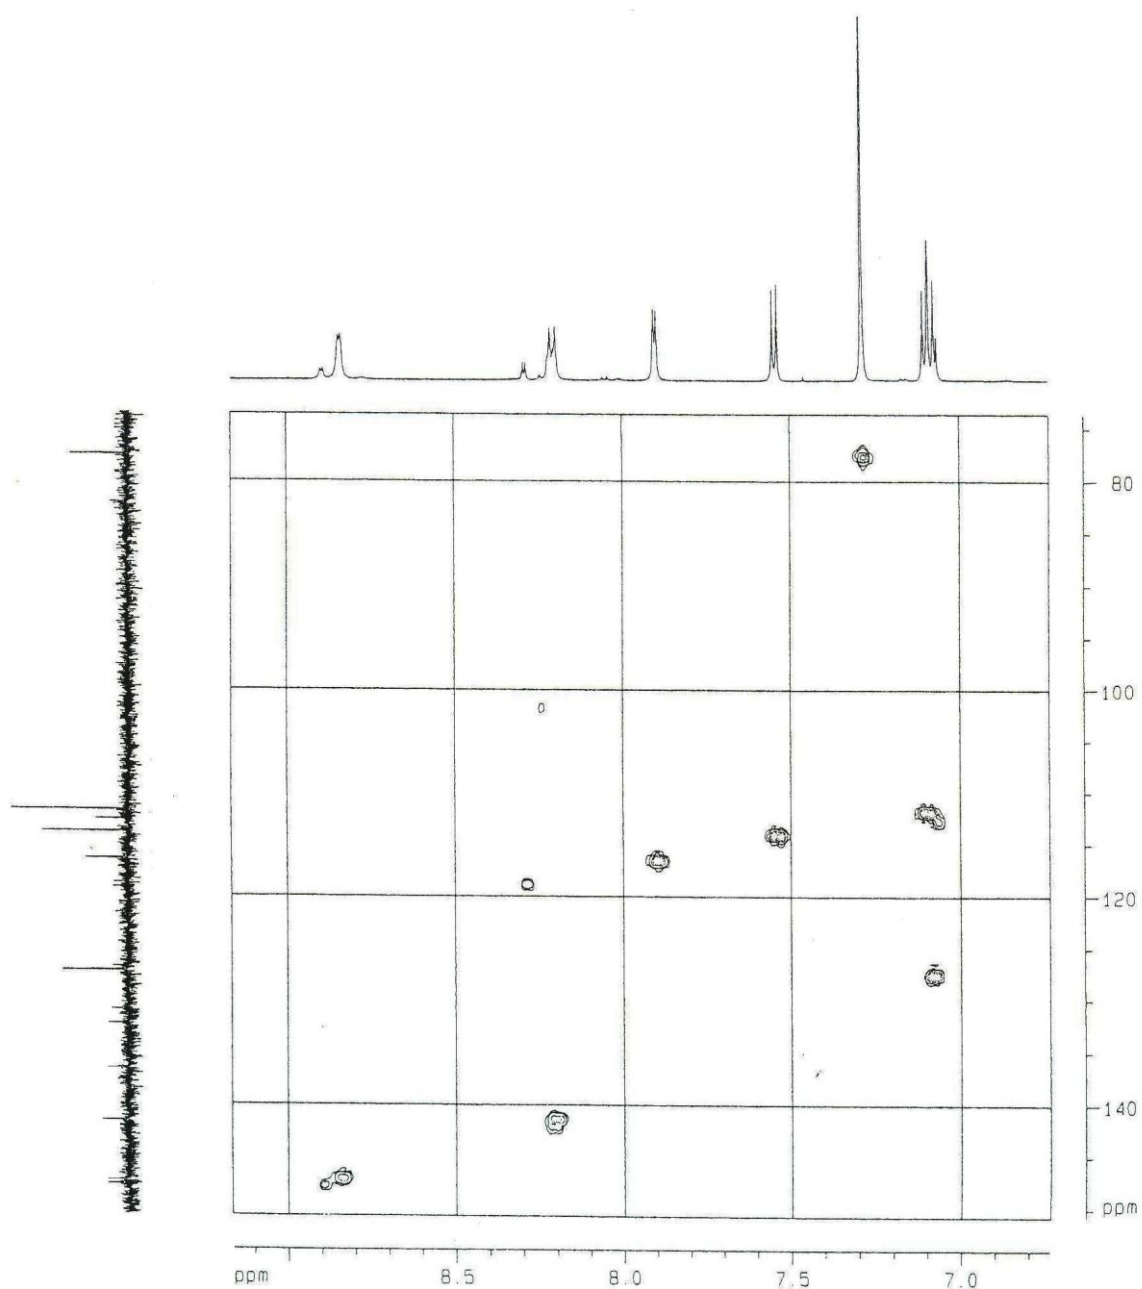

**Figure 19:** HMQC spectrum of compound **4** (600 MHz,  $\text{CDCl}_3$ ).

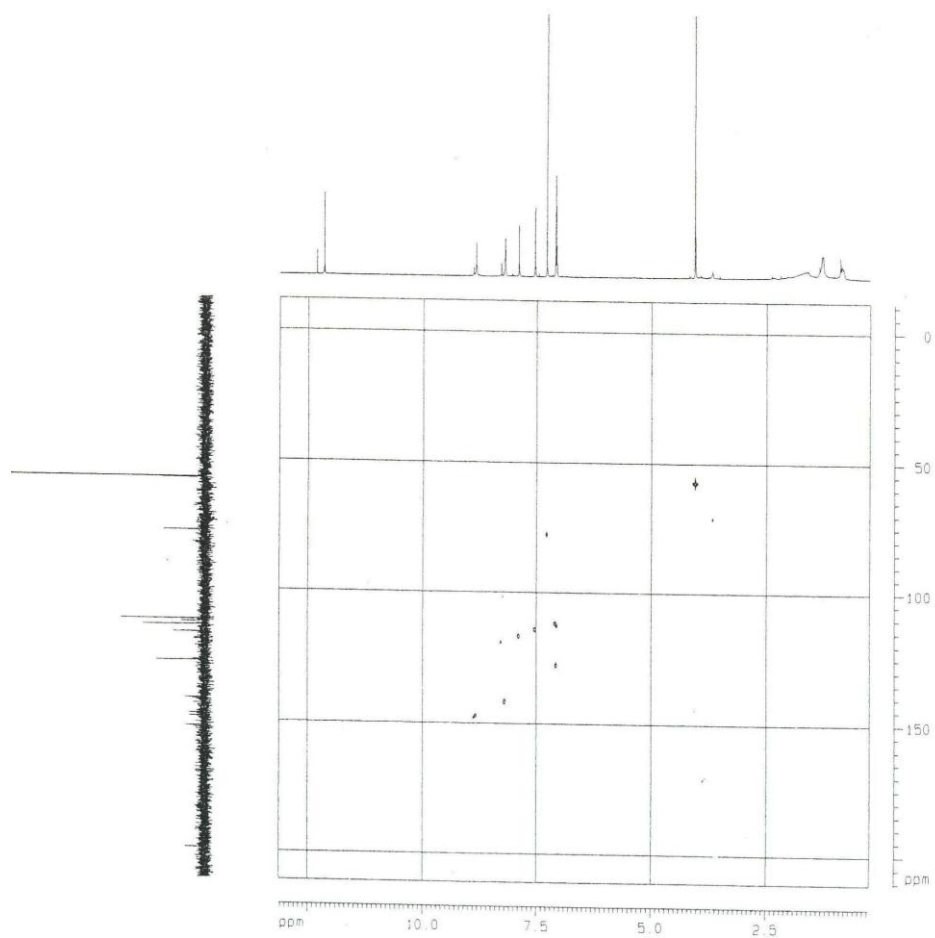

**Figure 20:** HMQC spectrum of compound **4** (600 MHz, CDCl<sub>3</sub>).

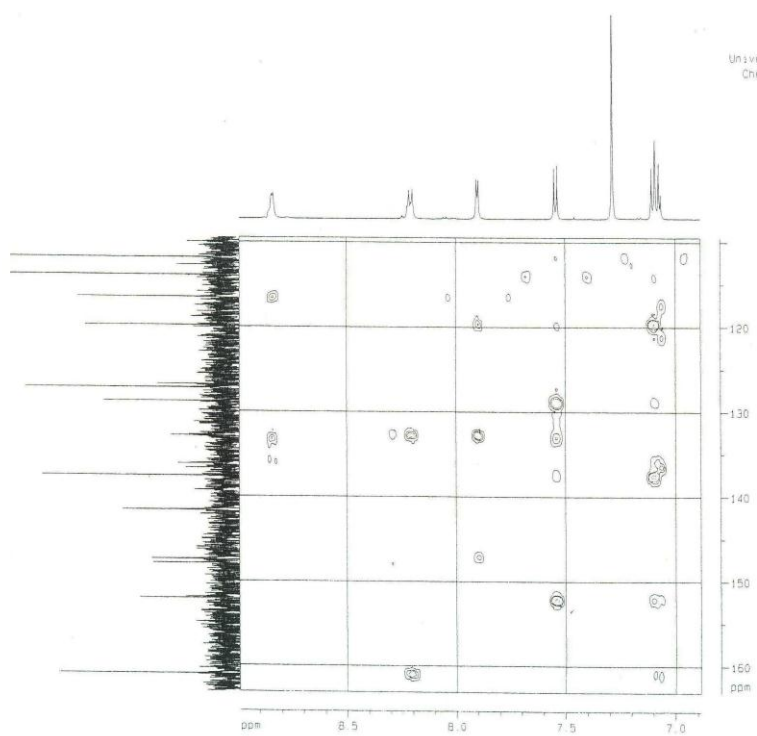

**Figure 21:** HMQC spectrum of compound **4** (600 MHz, CDCl<sub>3</sub>).

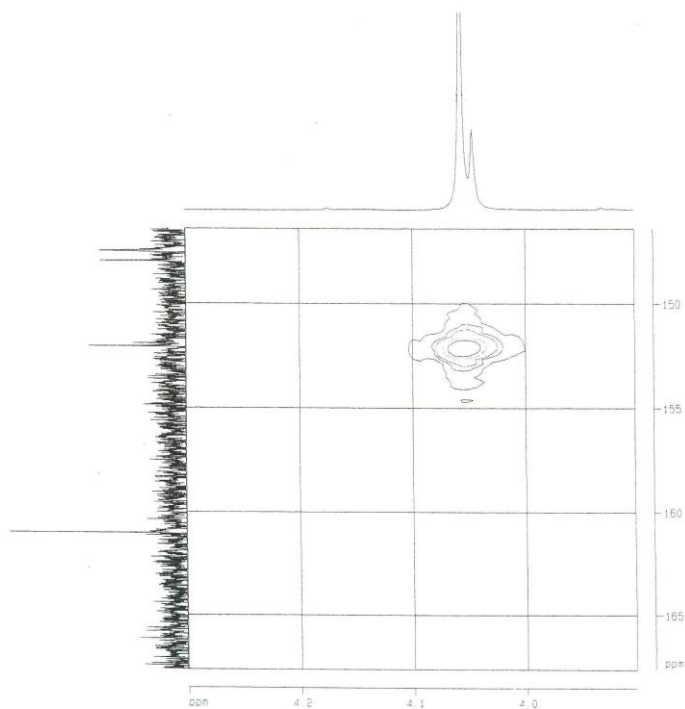

**Figure 22:** HMQC spectrum of compound **4** (600 MHz,  $\text{CDCl}_3$ ).

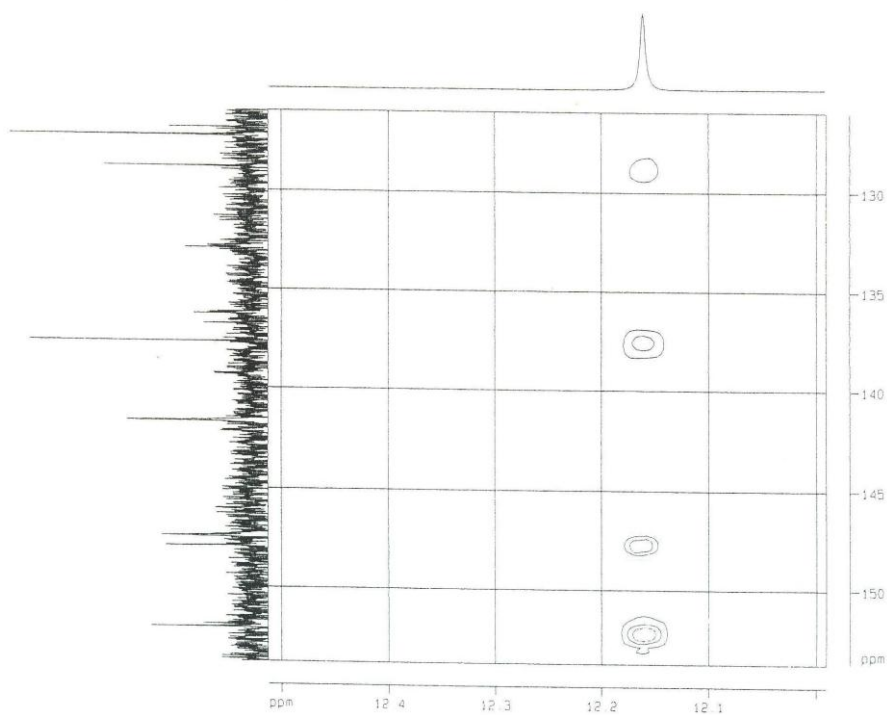

**Figure 23:** HMQC spectrum of compound **4** (600 MHz,  $\text{CDCl}_3$ ).
